# Supplementary material
Source: ML conference proceedings conference paper supplement (https://proceedings.mlr.press/v80/wang18l.html)
Supplement: Supplementary file 1 [file wang18l-supp.pdf]

---

## Appendix for “Stein Variational Message Passing for Continuous Graphical Models”

---

### A. Proof of Theorem 1

*Proof.* Consider  $\mathbf{f} = [f_1, \dots, f_d]^\top \in \mathcal{H}$ , where  $\mathcal{H} = \mathcal{H}_1 \times \dots \times \mathcal{H}_d$ . Using the reproducing property of  $\mathcal{H}_i$ , we have for any  $f_i \in \mathcal{H}_i$

$$\mathbb{E}_{x \sim q}[\mathcal{P}_{x_i} f_i(x)] = \langle f_i, \mathbb{E}_{x \sim q}[\mathcal{P}_{x_i} k_i(x, \cdot)] \rangle_{\mathcal{H}_i}.$$

Recall that  $\phi_i^*(\cdot) = \mathbb{E}_{x \sim q}[\mathcal{P}_{x_i} k_i(x, \cdot)]$ , and  $\phi^* = [\phi_1^*, \dots, \phi_d^*]^\top$ . The optimization of the Stein Discrepancy is framed into

$$\begin{aligned} \mathbb{D}(q \parallel p) &= \max_{\mathbf{f} \in \mathcal{H}, \|\mathbf{f}\|_{\mathcal{H}} \leq 1} \mathbb{E}_{x \sim q}[\mathcal{P}_x^\top \mathbf{f}(x)] \\ &= \max_{\mathbf{f} \in \mathcal{H}, \|\mathbf{f}\|_{\mathcal{H}} \leq 1} \sum_{i=1}^d \mathbb{E}_{x \sim q}[\mathcal{P}_{x_i} f_i(x)] \\ &= \max_{\mathbf{f} \in \mathcal{H}, \|\mathbf{f}\|_{\mathcal{H}} \leq 1} \sum_{i=1}^d \langle f_i, \phi_i^* \rangle_{\mathcal{H}_i} \\ &= \max_{\mathbf{f} \in \mathcal{H}, \|\mathbf{f}\|_{\mathcal{H}} \leq 1} \langle \mathbf{f}, \phi^* \rangle_{\mathcal{H}}. \end{aligned}$$

This shows that the optimal  $\mathbf{f}$  should equal  $\phi^* / \|\phi^*\|_{\mathcal{H}}$ , and  $\mathbb{D}(q \parallel p) = \langle \phi^* / \|\phi^*\|_{\mathcal{H}}, \phi^* \rangle_{\mathcal{H}} = \|\phi^*\|_{\mathcal{H}}$ .  $\square$

### B. Proof of Theorem 2

*Proof.* Plugging the optimal solution in Theorem 1 into the definition of Stein discrepancy (2), we get

$$\begin{aligned} \mathbb{D}(q \parallel p) &= \frac{1}{\|\phi^*\|_{\mathcal{H}}} \mathbb{E}_{x \sim q}[\mathcal{P}_x^\top \phi^*(x)] \\ &= \frac{1}{\|\phi^*\|_{\mathcal{H}}} \sum_{i=1}^d \mathbb{E}_{x \sim q}[\mathcal{P}_{x_i} \phi_i^*(x)] \\ &= \frac{1}{\|\phi^*\|_{\mathcal{H}}} \sum_{i=1}^d \mathbb{E}_{x, x' \sim q}[\mathcal{P}_{x_i} \mathcal{P}_{x'_i} k_i(x, x')]. \end{aligned}$$

On other hand, because  $\mathbb{D}(q \parallel p) = \|\phi^*\|_{\mathcal{H}}$ , we have

$$\mathbb{D}(q \parallel p)^2 = \sum_{i=1}^d \mathbb{E}_{x, x' \sim q}[\mathcal{P}_{x_i} \mathcal{P}_{x'_i} k_i(x, x')]. \quad (\text{B.1})$$

To prove (10), note that

$$\begin{aligned} &\mathbb{E}_{x \sim q}[\mathcal{P}_{x_i} f(x)] \\ &= \mathbb{E}_{x \sim q}[\mathcal{P}_{x_i} f] - \mathbb{E}_q[\mathcal{Q}_{x_i} f] \\ &= \mathbb{E}_{x \sim q}[(\nabla_{x_i} \log p(x) - \nabla_{x_i} \log q(x))f(x)] \\ &= \mathbb{E}_{x \sim q}[(\nabla_{x_i} \log p(x_i | x_{-i}) - \nabla_{x_i} \log q(x_i | x_{-i}))f(x)] \\ &= \mathbb{E}_{x \sim q}[\delta_i(x) f(x)]. \end{aligned}$$

Applying this equation twice to (B.1) gives

$$\mathbb{D}(q \parallel p)^2 = \sum_{i=1}^d \mathbb{E}_{x, x' \sim q}[\delta_i(x) k_i(x, x') \delta_i(x')]. \quad (\text{B.2})$$

By (B.2) and the definition of strictly integrally positive definite kernels, we can see that  $\mathbb{D}(q \parallel p) = 0$  implies  $\delta_i(x) = 0, \forall i \in [d]$ , if  $k_i(x, x')$  is strictly integrally positive definite for each  $i$ . Note that  $\delta_i(x) = 0$  means  $p$  and  $q$  matches the conditional probabilities:

$$p(x_i | x_{-i}) = q(x_i | x_{-i}), \quad \forall i \in [d]. \quad (\text{B.3})$$

For positive densities, this implies that  $p(x) = q(x)$  (see e.g., Brook (1964); Besag (1974)).  $\square$

### C. Proof of Theorem 3

*Proof.* For a graphical model  $p(x)$  with Markov blanket  $\mathcal{N}_i$  for node  $i$ , we have

$$\nabla_{x_i} \log p(x_i | x_{-i}) = \nabla_{x_i} \log p(x_i | x_{\mathcal{N}_i}) \quad \forall i \in [d].$$

Moreover, by Stein’s identity on  $q$ , we have

$$\mathbb{E}_{x \sim q}[\nabla_{x_i} \log q(x_i | x_{\mathcal{N}_i}) f(x) + \nabla_{x_i} f(x)] = 0, \quad \forall i \in [d].$$

With a similar argument as the proof of Theorem 2, we get

$$\begin{aligned} &\mathbb{E}_{x \sim q}[\mathcal{P}_{x_i} f(x)] \\ &= \mathbb{E}_{x \sim q}[(\nabla_{x_i} \log p(x_i | x_{\mathcal{N}_i}) - \nabla_{x_i} \log q(x_i | x_{\mathcal{N}_i}))f(x)] \\ &= \mathbb{E}_{x \sim q}[\delta_i(x_{\mathcal{C}_i}) f(x)], \end{aligned}$$

where  $\delta_i(x_{\mathcal{C}_i}) = \nabla_{x_i} \log q(x_i | x_{\mathcal{N}_i}) - \nabla_{x_i} \log p(x_i | x_{\mathcal{N}_i})$ .

Applying this equation twice to (B.1) gives

$$\mathbb{D}(q \parallel p)^2 = \sum_{i=1}^d \mathbb{E}_{x, x' \sim q}[\delta_i(x_{\mathcal{C}_i}) k_i(x, x') \delta_i(x'_{\mathcal{C}_i})].$$

Therefore, if  $k_i(x, x')$  is strictly integrally positive definite on  $x_{C_i}$ , Stein discrepancy  $\mathbb{D}(q \parallel p) = 0$  if and only if  $q(x_i|x_{N_i}) = p(x_i|x_{N_i})$ .  $\square$

## References

- Besag, J. Spatial interaction and the statistical analysis of lattice systems. *Journal of the Royal Statistical Society. Series B (Methodological)*, pp. 192–236, 1974.
- Besse, F., Rother, C., Fitzgibbon, A., and Kautz, J. PMBP: Patchmatch belief propagation for correspondence field estimation. *International Journal of Computer Vision*, 110(1):2–13, 2014.
- Brook, D. On the distinction between the conditional probability and the joint probability approaches in the specification of nearest-neighbour systems. *Biometrika*, 51(3/4):481–483, 1964.
- Chwialkowski, K., Strathmann, H., and Gretton, A. A kernel test of goodness of fit. In *Proceedings of the International Conference on Machine Learning (ICML)*, 2016.
- Duchi, J., Hazan, E., and Singer, Y. Adaptive subgradient methods for online learning and stochastic optimization. *The Journal of Machine Learning Research*, 12:2121–2159, 2011.
- Gorham, J. and Mackey, L. Measuring sample quality with kernels. *Proceedings of the International Conference on Machine Learning (ICML)*, 2017.
- Gretton, A., Borgwardt, K. M., Rasch, M. J., Schölkopf, B., and Smola, A. A kernel two-sample test. *The Journal of Machine Learning Research*, 13(1):723–773, 2012.
- Hoffman, M. D. and Gelman, A. The no-U-turn sampler: adaptively setting path lengths in Hamiltonian Monte Carlo. *Journal of Machine Learning Research*, 15(1):1593–1623, 2014.
- Ihler, A. and McAllester, D. Particle belief propagation. In *Artificial Intelligence and Statistics*, pp. 256–263, 2009.
- Ihler, A. T., Fisher, J. W., Moses, R. L., and Willsky, A. S. Nonparametric belief propagation for self-localization of sensor networks. *IEEE Journal on Selected Areas in Communications*, 23(4):809–819, 2005.
- Lauritzen, S. L. *Graphical models*, volume 17. Clarendon Press, 1996.
- Liu, Q. Stein variational gradient descent as gradient flow. In *Advances in neural information processing systems (NIPS)*, pp. 3118–3126, 2017.
- Liu, Q. and Wang, D. Stein variational gradient descent: A general purpose Bayesian inference algorithm. In *Advances In Neural Information Processing Systems (NIPS)*, pp. 2370–2378, 2016.
- Liu, Q., Ihler, A. T., and Steyvers, M. Scoring workers in crowdsourcing: How many control questions are enough? In *Advances in Neural Information Processing Systems (NIPS)*, pp. 1914–1922, 2013.
- Liu, Q., Lee, J. D., and Jordan, M. I. A kernelized Stein discrepancy for goodness-of-fit tests. In *Proceedings of the International Conference on Machine Learning*, 2016.
- Nelsen, R. B. *An introduction to copulas*. Springer Science & Business Media, 2007.
- Oates, C. J., Cockayne, J., Briol, F.-X., and Girolami, M. Convergence rates for a class of estimators based on Stein’s identity. *arXiv preprint arXiv:1603.03220*, 2016.
- Pacheco, J. and Sudderth, E. Proteins, particles, and pseudo-max-marginals: A submodular approach. In *International Conference on Machine Learning (ICML)*, pp. 2200–2208, 2015.
- Pacheco, J., Zuffi, S., Black, M., and Sudderth, E. Preserving modes and messages via diverse particle selection. In *Proceedings of the 31st International Conference on Machine Learning (ICML)*, pp. 1152–1160, 2014.
- Pearl, J. *Probabilistic Reasoning in Intelligent Systems: Networks of Plausible Inference*. Morgan Kaufmann Publishers Inc., 1988.
- Song, L., Gretton, A., Bickson, D., Low, Y., and Guestrin, C. Kernel belief propagation. In *Proceedings of the International Conference on Artificial Intelligence and Statistics (AISTATS)*, pp. 707–715, 2011.
- Sudderth, E. B., Ihler, A. T., Isard, M., Freeman, W. T., and Willsky, A. S. Nonparametric belief propagation. *Communications of the ACM*, 53(10):95–103, 2010.
- Wainwright, M. and Jordan, M. Graphical models, exponential families, and variational inference. *Found. Trends Mach. Learn.*, 1(1-2):1–305, 2008.
- Wang, D., Fisher III, J. W., and Liu, Q. Efficient observation selection in probabilistic graphical models using Bayesian lower bounds. In *Proceedings of the Conference on Uncertainty in Artificial Intelligence*, 2016.
- Yedidia, J. S., Freeman, W. T., and Weiss, Y. Understanding belief propagation and its generalizations. *Exploring artificial intelligence in the new millennium*, 8:236–239, 2003.

Zhuo, J., Liu, C., Shi, J., Zhu, J., Chen, N., and Zhang,  
B. Message passing Stein variational gradient descent.  
*arXiv preprint arXiv:1711.04425v2*, 2018.
